# Supplementary material
Source: MDPI journal article supplement (https://www.mdpi.com/2313-0105/9/12/573)
Supplement: s1 [file s1]

## Supporting Information

# Disparate Redox Potentials in Mixed Isomer Electrolytes Reduce Voltage Efficiency of Energy Dense Flow Batteries

Casey M. Davis <sup>1</sup>, Scott E. Waters <sup>1</sup>, Brian H. Robb <sup>2</sup>, Jonathan R. Thurston <sup>1</sup>, David Reber <sup>3,\*</sup> and Michael P. Marshak <sup>1,4</sup>

<sup>1</sup> Department of Chemistry, University of Colorado Boulder, Boulder, CO 80309, USA; jonathan.thurston@colorado.edu (J.R.T.)

<sup>2</sup> Department of Chemical and Biological Engineering, University of Colorado Boulder, Boulder, CO 80309, USA

<sup>3</sup> Empa, Swiss Federal Laboratories for Materials Science and Technology, 8600 Dübendorf, Switzerland

<sup>4</sup> Renewable and Sustainable Energy Institute, University of Colorado Boulder, Boulder, CO 80309, USA

\* Correspondence: david.reber@empa.ch

## Table of Contents

|      |                                                                                         |     |
|------|-----------------------------------------------------------------------------------------|-----|
| I.   | Characterization.....                                                                   | S6  |
|      | a. Single-Crystal X-Ray Diffraction                                                     |     |
|      | b. Spectroscopy                                                                         |     |
|      | c. Cyclic Voltammetry                                                                   |     |
|      | d. Spectroelectrochemistry                                                              |     |
| II.  | Flow Battery Cell Data.....                                                             | S9  |
|      | a. 1 M KCr(1,2-PDТА) Cell                                                               |     |
|      | b. 1 M KCr(1,3-PDТА) Cell                                                               |     |
|      | c. 1.5 M KCr(1,2-PDТА) Cell                                                             |     |
|      | d. 1 M Mixed Cell                                                                       |     |
|      | e. 2 M Mixed Cell                                                                       |     |
| III. | Tables and Equations.....                                                               | S18 |
|      | a. XRD data                                                                             |     |
|      | b. Spectroscopy peaks and corresponding values                                          |     |
|      | c. Heterogeneous rate transfer constants ( $k^0$ ) and diffusion coefficients ( $D_0$ ) |     |
|      | d. Relevant Viscosities, Densities, and ASRs                                            |     |
|      | e. Equation Relating Redox Potential and Binding Constants                              |     |
| IV.  | References.....                                                                         | S19 |

## I. CHARACTERIZATION

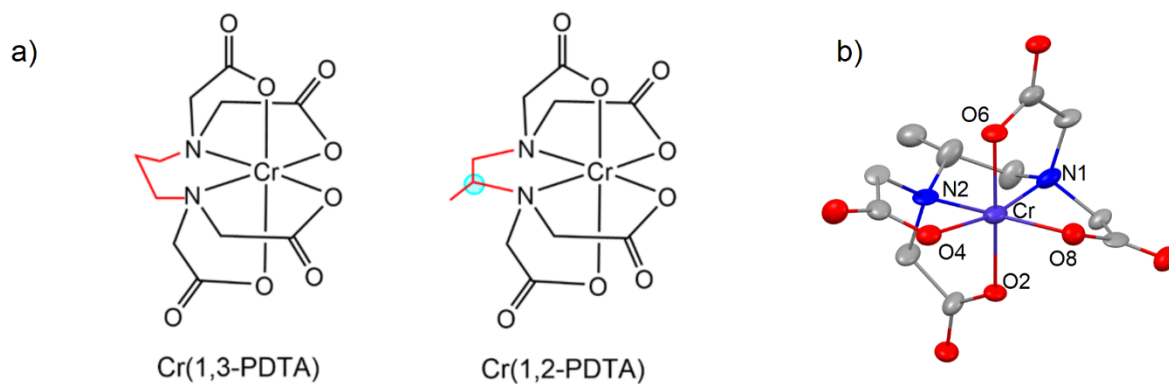

**Figure S1.** Representations of the monoanionic structurally isomeric chromium-chelate complexes. a) Cr(1,3-PDТА) and Cr(1,2-PDТА) with the stereocenter highlighted in blue and b) the single-crystal X-ray diffraction structure of Cr(1,2-PDТА) with hydrogens, potassium, and waters omitted for clarity, showing 50% probability thermal ellipsoids. Analysis is qualitative as the enantiomeric nature of KCr(1,2-PDТА) prevented the acquisition of high-quality data.

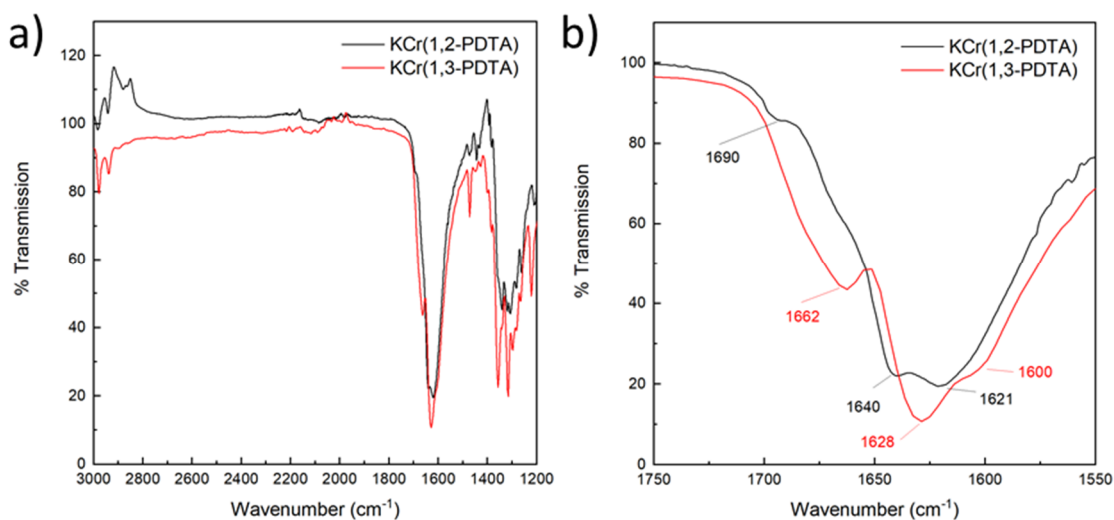

**Figure S2.** IR spectroscopy data of the examined Cr(1,2-PDТА) and Cr(1,3-PDТА) complexes. a) full spectrum, b) C=O stretching region.

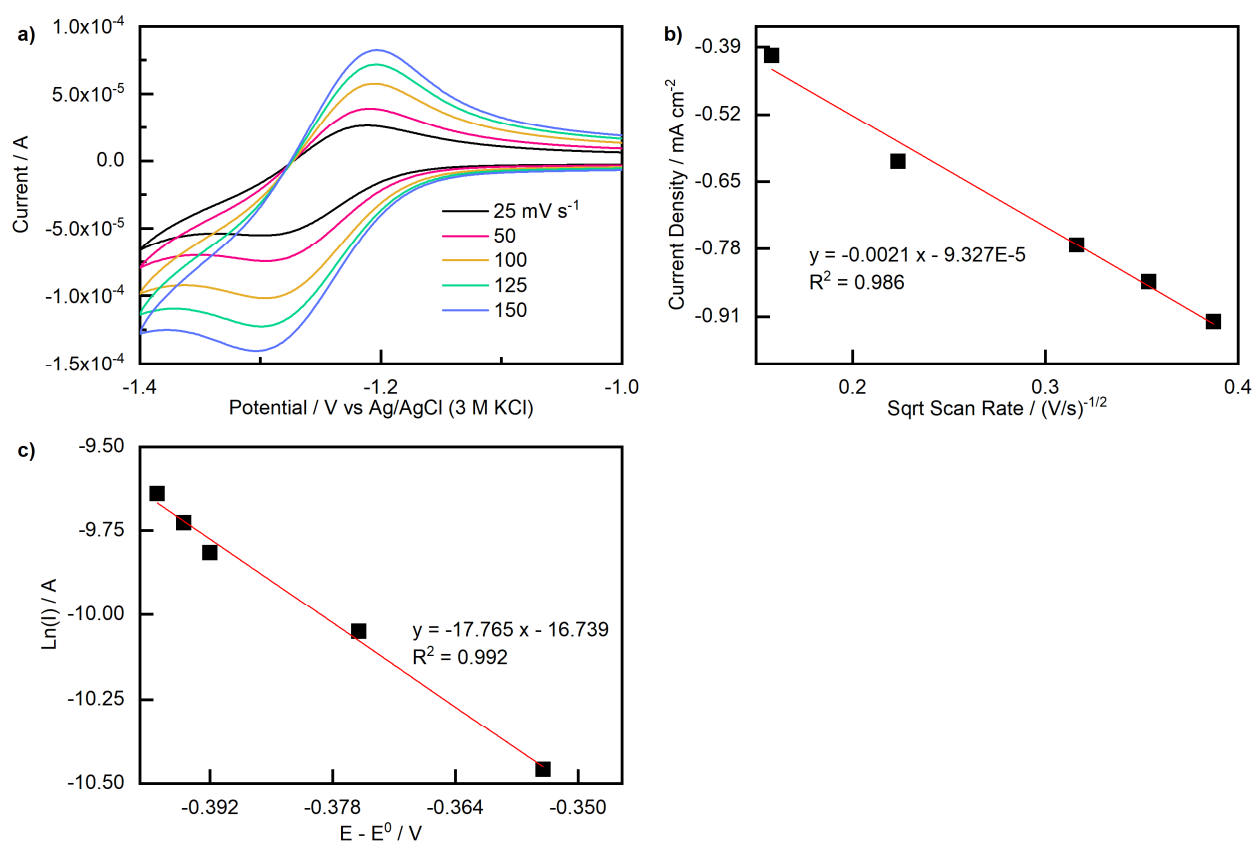

**Figure S3.** Cyclic voltammetry of 5 mM KCr(1,2-PDTA) in 0.5 M KCl and 0.1 M 1,2-PDTA at pH 7.05 for electrochemical kinetic studies. (a) Cyclic voltammograms at varying scan rates. (b) Peak reduction current density as a function of the square root of the scan rate,  $v^{1/2}$ . (c) The natural log of the peak reduction current ( $i_{pc}$ ) as a function of the difference in potential between calculated  $E^0$  and the voltage at the peak reduction current density ( $E_{pc}$ ).

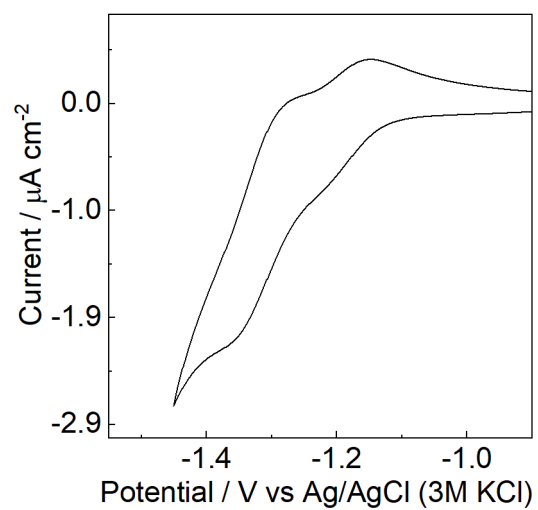

**Figure S4.** Cyclic voltammetry of 10 mM total equimolar mixed KCr(1,2-PDPA) and KCr(1,3-PDPA) at pH 7 on a bismuth-functionalized glassy carbon electrode.

## II. FLOW BATTERY CELL DATA

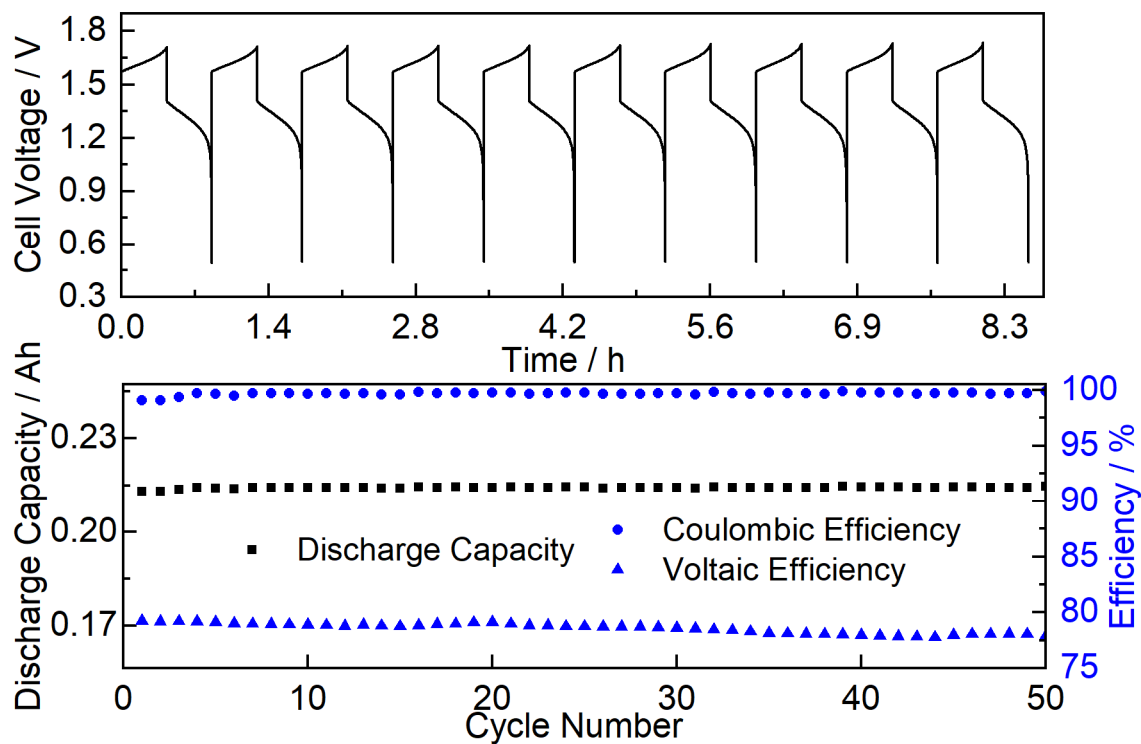

**Figure S5.** Redox flow battery (RFB) cell cycling data of 1 M KCr(1,2-PDTA) versus HCF. (Top) Cell voltage as a function of time for the first ten cycles. (Bottom) Discharge capacity and voltage and Coulombic efficiencies over the 50 cycles.

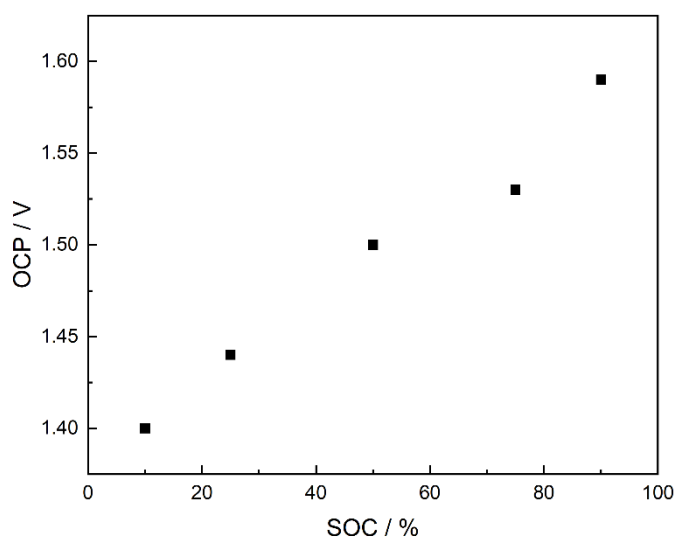

**Figure S6.** Open circuit potential vs. state-of-charge of the negolyte for 1 M KCr(1,2-PDTA).

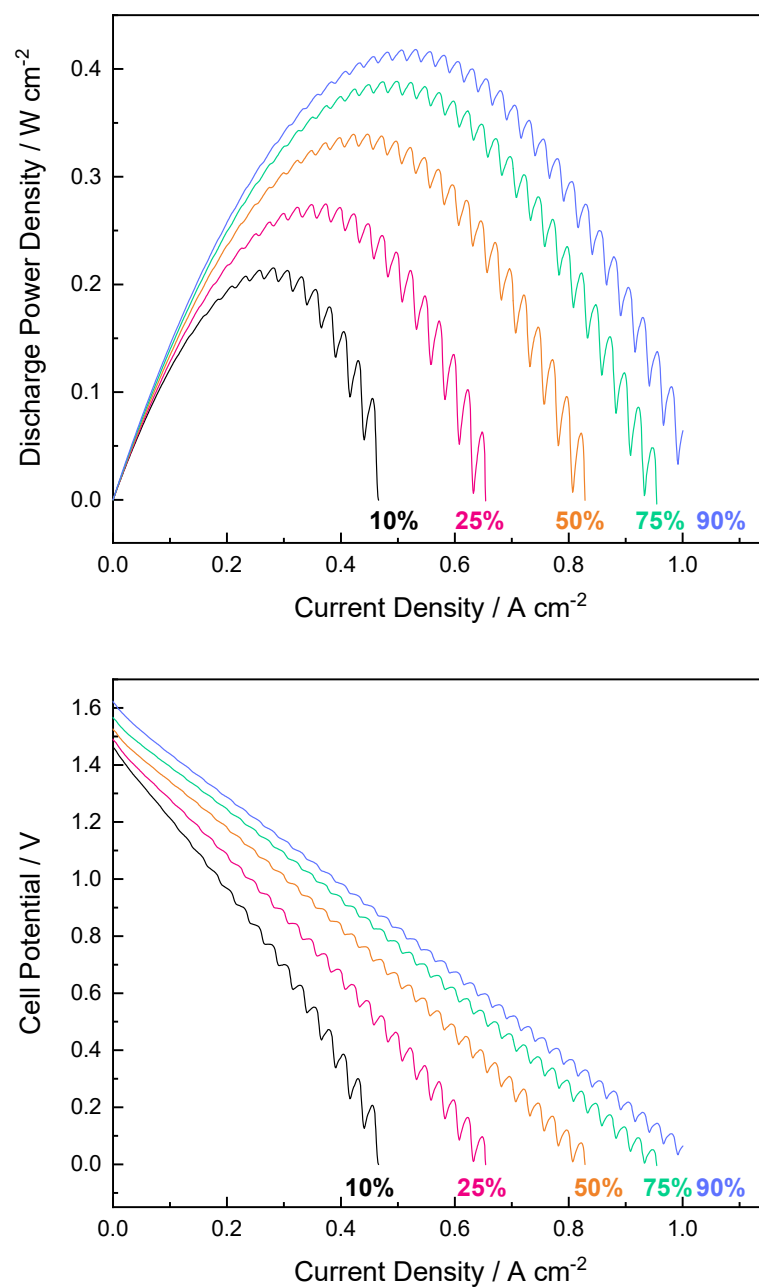

**Figure S7.** Power data for the 1 M KCr(1,2-PDTA) cell. (Top) Discharge power density as a function of current density. (Bottom) Polarization curves demonstrating cell potential as a function of current density. The pulsing of the lines is caused by the pump action of the peristaltic pumps.

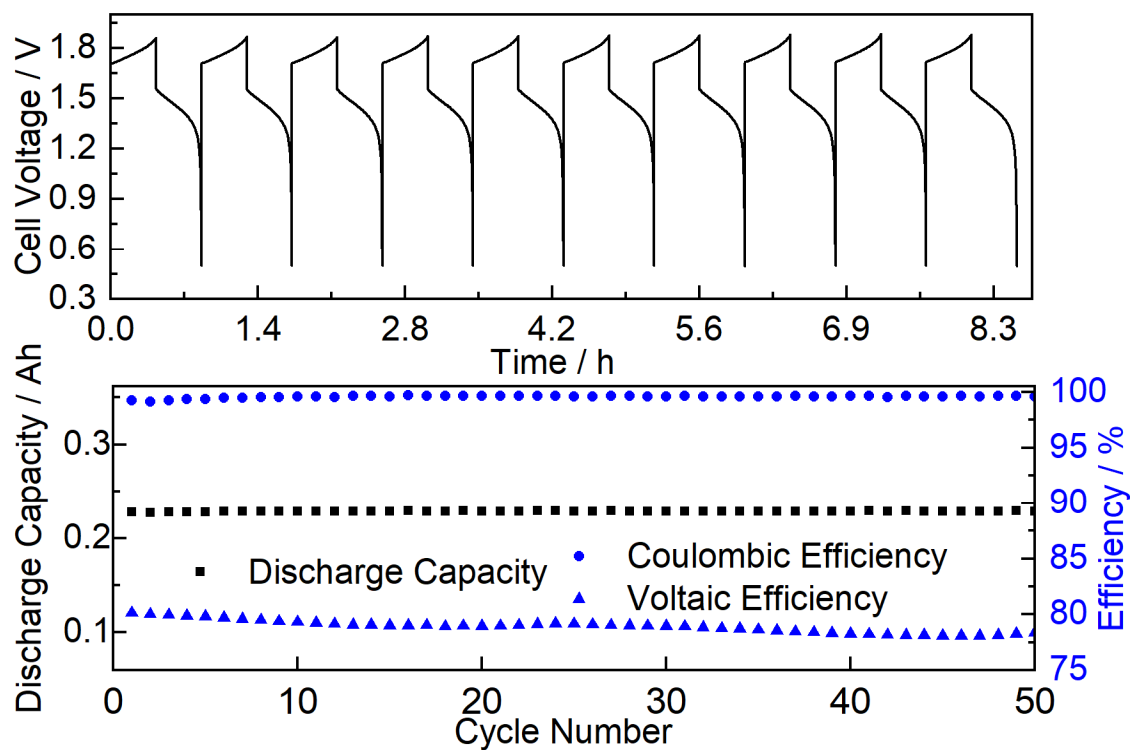

**Figure S8.** RFB cell cycling data of 1 M KCr(1,3-PDTA) versus HCF. (Top) Cell voltage as a function of time for the first ten cycles. (Bottom) Discharge capacity and voltage and Coulombic efficiencies over the 50 cycles.



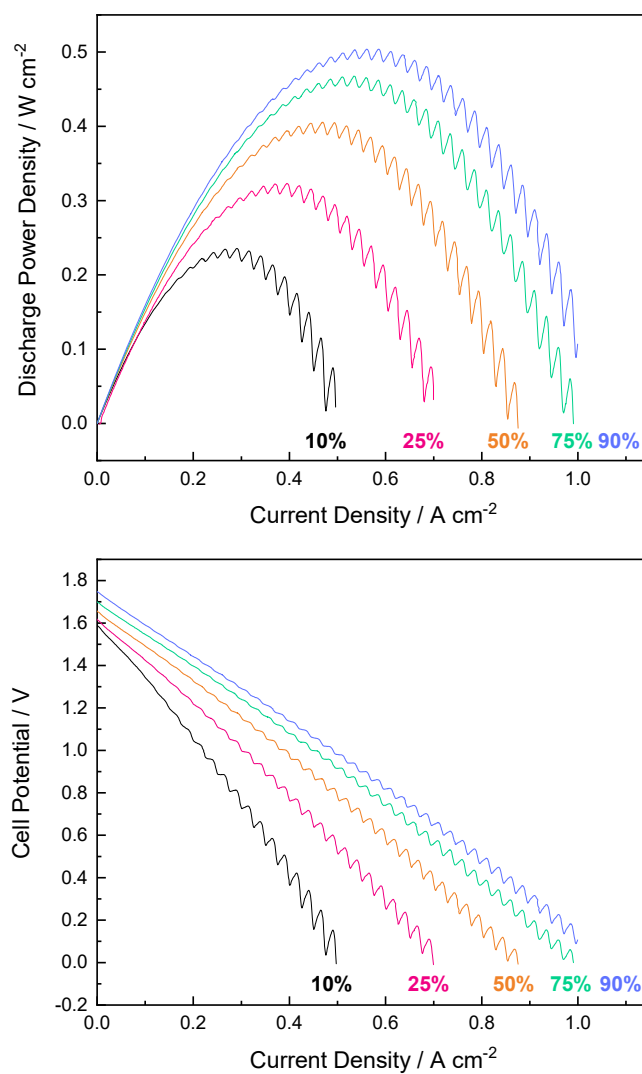

**Figure S9.** Power data for the 1 M KCr(1,3-PDTA) cell. (Top) Discharge power density as a function of current density. (Bottom) Polarization curves demonstrating cell potential as a function of current density.

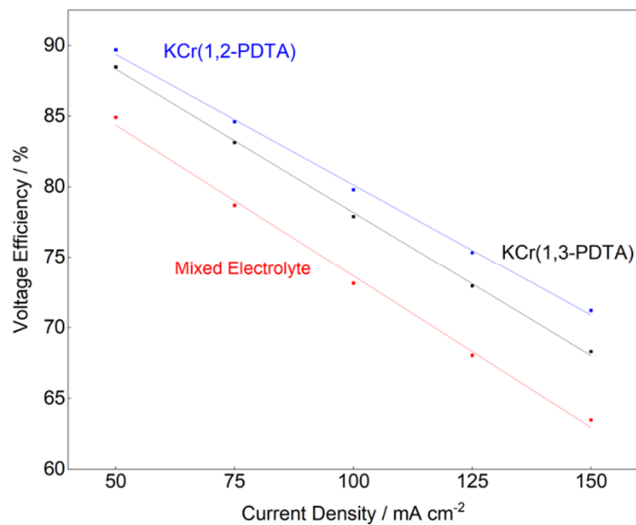

**Figure S10.** Voltage efficiency vs. current density for the 1 M KCr(1,2-PDТА), 1 M KCr(1,3-PDТА), and mixed 1 M cells.

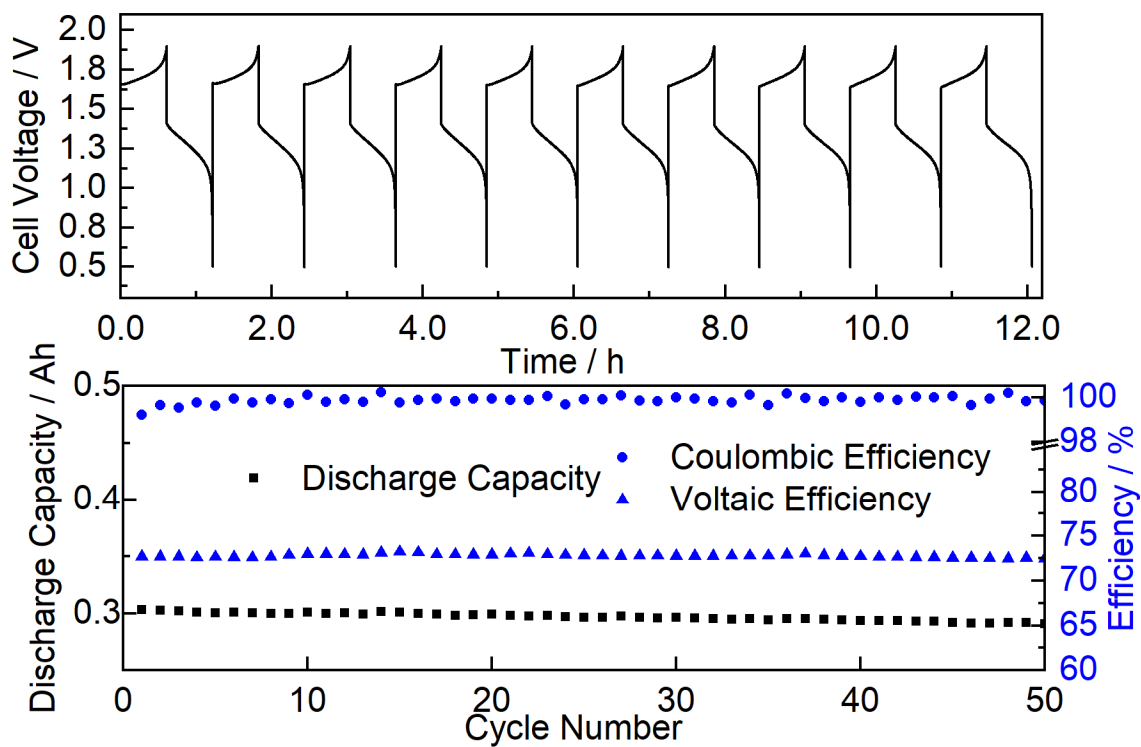

**Figure S11.** RFB cell cycling data of 1.5 M KCr(1,2-PDТА) versus HCF. (Top) Cell voltage as a function of time for the first ten cycles. (Bottom) Discharge capacity and voltage and Coulombic efficiencies across the 50 cycles.

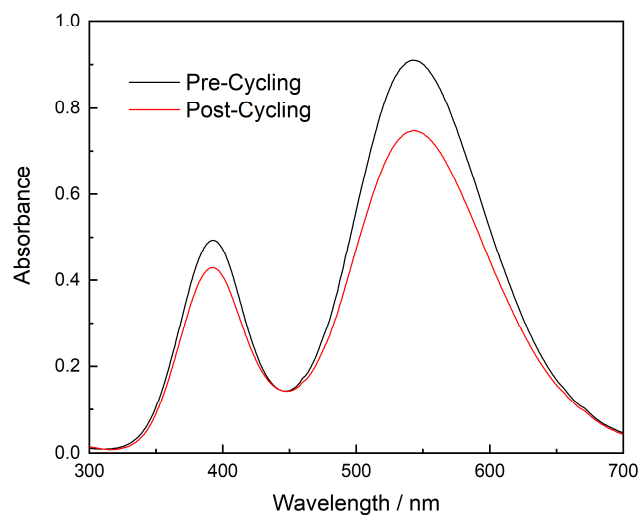

**Figure S12.** UV-Vis spectra of 0.1 M KCr(1,2-PDTA) with 0.1 M 1,3-PDTA buffer electrolyte bulk electrolyzed to test for ligand exchange.

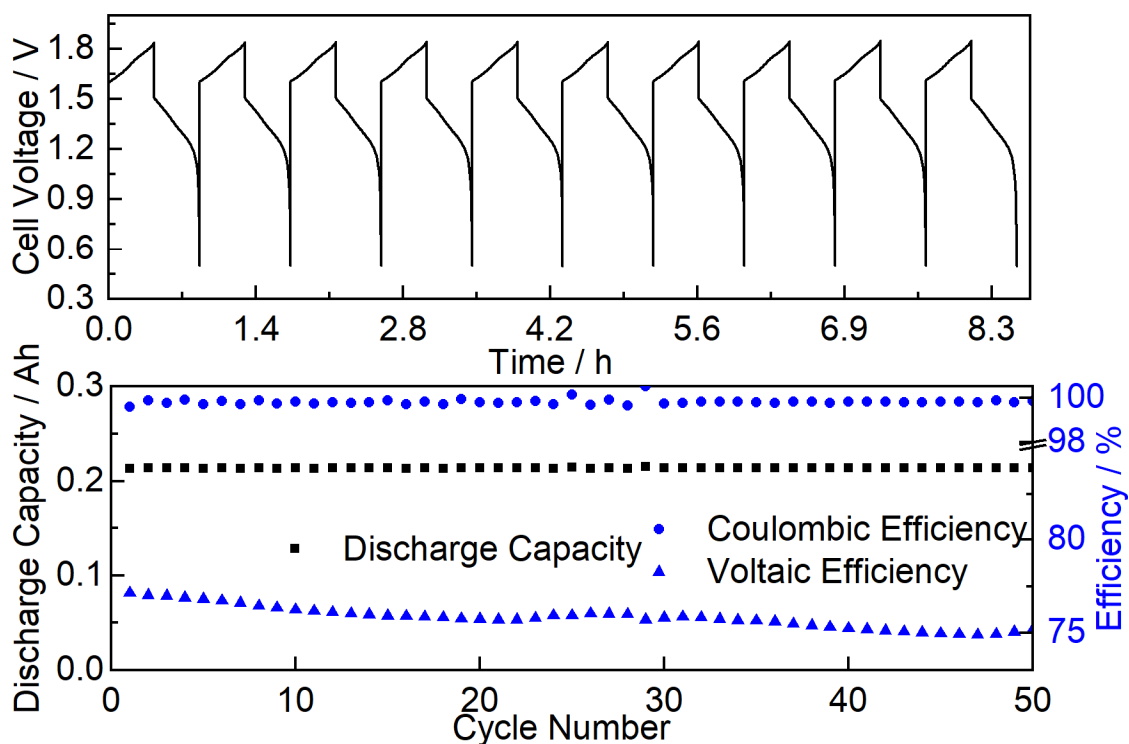

**Figure S13.** RFB cell cycling data of the mixed electrolyte cell with a total 1 M Cr negolyte comprising 0.5 M KCr(1,2-PDTA) and 0.5 M KCr(1,3-PDTA) versus HCF. Cell voltage as a function of time for the first ten cycles. (Bottom) Discharge capacity and voltage and Coulombic efficiencies across the 50 cycles.

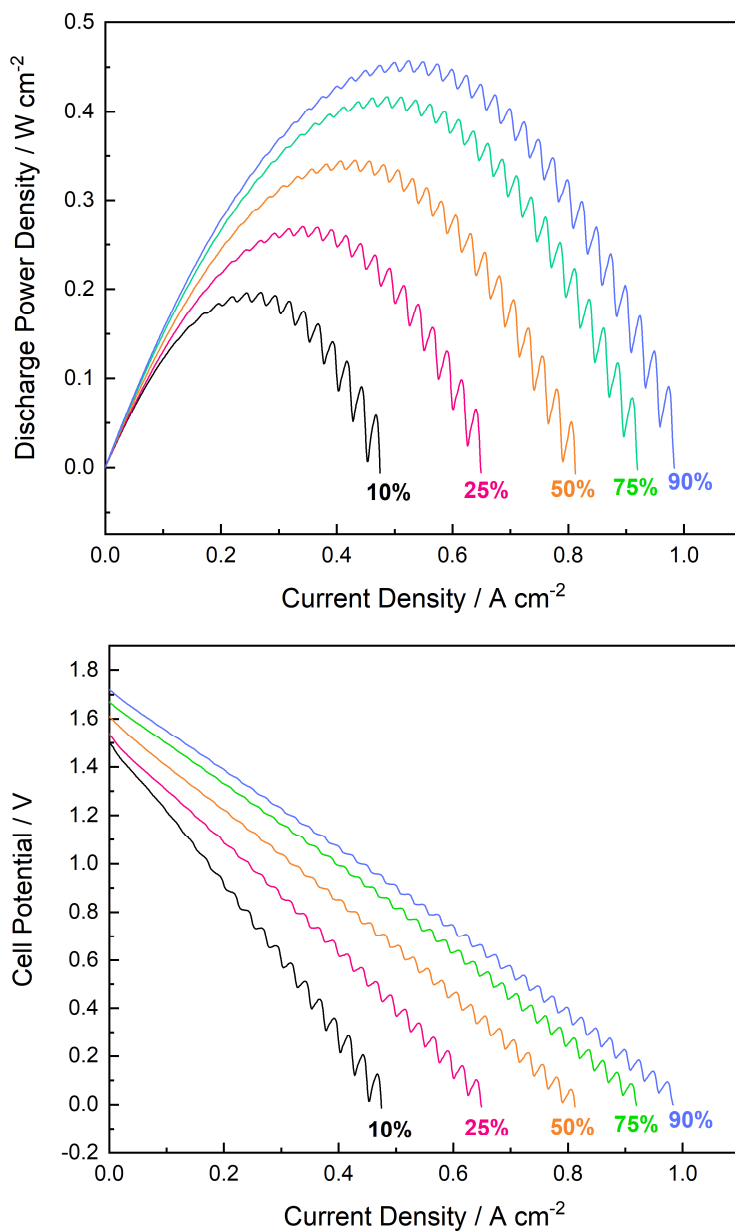

**Figure S14.** Power data for the mixed electrolyte cell with a total 1 M Cr negolyte comprising 0.5 M KCr(1,2-PDTA) and 0.5 M KCr(1,3-PDTA) versus HCF. (Top) Discharge power density as a function of current density. (Bottom) Polarization curves demonstrating cell potential as a function of current density.

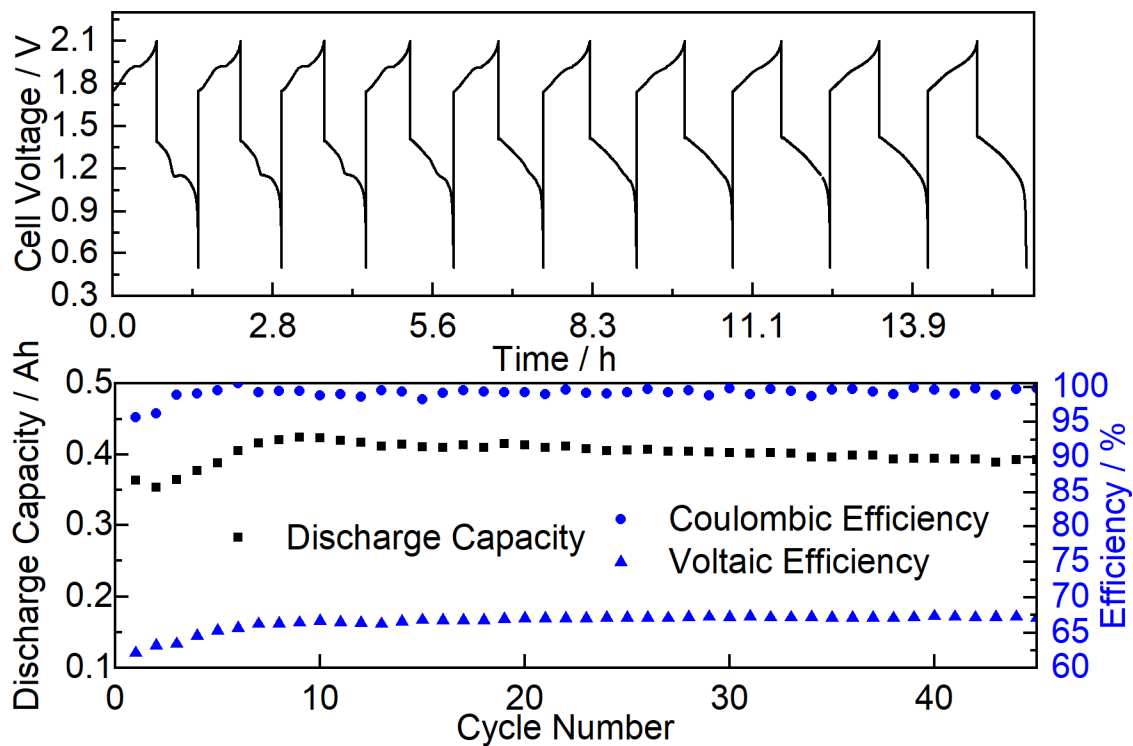

**Figure S15.** RFB cell cycling data of the mixed electrolyte cell with a total 2 M Cr negolyte comprising 1 M KCr(1,2-PDPA) and 1 M KCr(1,3-PDPA) versus HCF. (Top) Cell voltage as a function of time for the first ten cycles. (Bottom) Discharge capacity and voltage and Coulombic efficiencies across the 50 cycles.

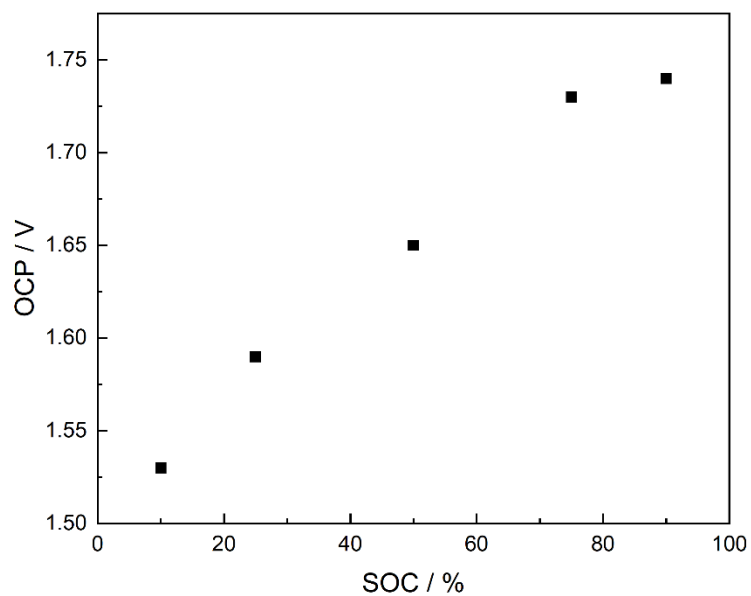

**Figure S16.** Open circuit potential as a function of state-of-charge of the cell containing the 2 M mixed negolyte.

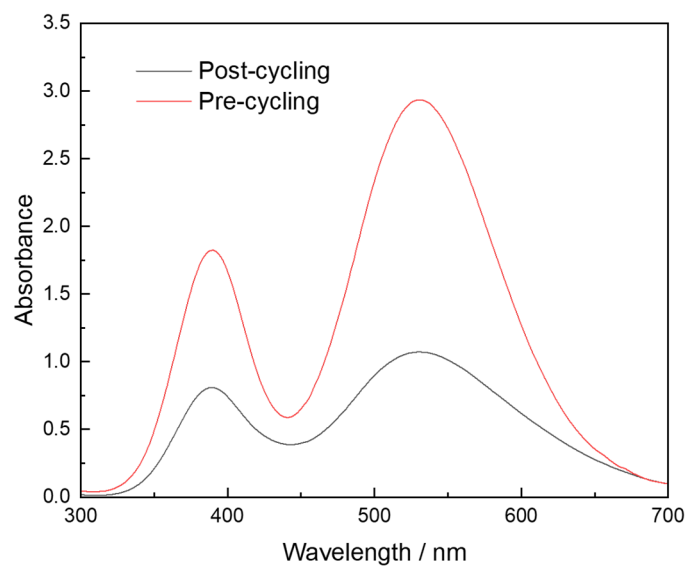

**Figure S17.** UV-Vis analysis of 2 M cell before and after cycling.

### III. TABLES AND EQUATIONS

**Table S1.** X-ray Crystallographic Table for KCr(1,2-PDTA).

|                             | 2                                                                |
|-----------------------------|------------------------------------------------------------------|
| Formula                     | KCrN <sub>2</sub> O <sub>8</sub> H <sub>14</sub> C <sub>11</sub> |
| fw, g/mol                   | 437.367                                                          |
| Temperature                 | 100(2) K                                                         |
| cryst. syst.                | Monoclinic                                                       |
| space group                 | P 1 21/c 1                                                       |
| color                       | Dark Violet                                                      |
| a (Å)                       | 19.410(3)                                                        |
| b (Å)                       | 13.474(2)                                                        |
| c (Å)                       | 13.4160(16)                                                      |
| α (deg)                     | 90                                                               |
| β (deg)                     | 104.775(6)                                                       |
| γ (deg)                     | 90                                                               |
| V (Å <sup>3</sup> )         | 3392.7(8)                                                        |
| Z                           | 8                                                                |
| no. refl.                   | 43130                                                            |
| unique refl.                | 6665                                                             |
| R <sub>int</sub>            | 0.1690                                                           |
| R1 <sup>a</sup> (all data)  | 0.1690                                                           |
| wR2 <sup>b</sup> (all data) | 0.1168                                                           |
| R1 [(I > 2σ)]               | 0.0889                                                           |
| wR2 [I > 2σ]                | 0.0978                                                           |
| GOF <sup>c</sup>            | 1.0828                                                           |

<sup>a</sup>R1 =  $\sum ||F_o| - |F_c|| / \sum |F_o|$ . <sup>b</sup>wR2 =  $(\sum (w(F_o^2 - F_c^2)^2) / \sum (w(F_o^2)^2))^{1/2}$ . <sup>c</sup>GOF =  $(\sum w(F_o^2 - F_c^2)^2 / (n - p))^{1/2}$  where  $n$  is the number of data and  $p$  is the number of parameters refined.

**Table S2.** IR peaks of each complex in the C=O stretching region (1690-1600 cm<sup>-1</sup>).

|               | Peak 1 / cm <sup>-1</sup> | Peak 2 / cm <sup>-1</sup> | Peak 3 / cm <sup>-1</sup> |
|---------------|---------------------------|---------------------------|---------------------------|
| KCr(1,2-PDTA) | 1690                      | 1640                      | 1621                      |
| KCr(1,3-PDTA) | 1662                      | 1628                      | 1600                      |

**Table S3.** UV-Vis peaks and respective molar absorptivities for KCr(1,2-PDTA) and KCr(1,3-PDTA).

|               | Peak 1 (nm) / molar absorptivity (M <sup>-1</sup> cm <sup>-1</sup> ) | Peak 2 (nm) / molar absorptivity (M <sup>-1</sup> cm <sup>-1</sup> ) |
|---------------|----------------------------------------------------------------------|----------------------------------------------------------------------|
| KCr(1,2-PDTA) | 391 / 105                                                            | 541 / 191                                                            |
| KCr(1,3-PDTA) | 382 / 83                                                             | 506 / 116                                                            |

**Table S4.** Heterogeneous rate transfer constants ( $k^0$ ) and diffusion coefficients ( $D_0$ ) of KCr(1,2-PDPA) and KCr(1,3-PDPA).<sup>1</sup>

|               | Heterogeneous Electron<br>Transfer Rate $k^0$ ( $\times 10^{-4}$ cm s <sup>-1</sup> ) | Diffusion Coefficient $D_0$ ( $\times 10^{-6}$ cm <sup>2</sup> s <sup>-1</sup> ) |
|---------------|---------------------------------------------------------------------------------------|----------------------------------------------------------------------------------|
| KCr(1,2-PDPA) | 1.1                                                                                   | 4.1                                                                              |
| KCr(1,3-PDPA) | 1.7                                                                                   | 6.2                                                                              |

**Table S5.** Relevant electrolyte densities, viscosities, and area specific resistances (ASRs).

|                   | Density (g/ml)   | Viscosity (cP)   | ASR ( $\Omega$ cm <sup>2</sup> ) |
|-------------------|------------------|------------------|----------------------------------|
| 1 M KCr(1,2-PDPA) | 1.1              | 1.4              | 1.6                              |
| 1 M KCr(1,3-PDPA) | 1.2 <sup>2</sup> | 2.2 <sup>2</sup> | 1.7                              |
| 2 M Mixed         | 1.4              | 5.5              | 3.37                             |

**Equation S1.** Relationship of reduction potential with binding constant for Cr(III)/Cr(II)<sup>3</sup>:

$$E^{0'} = E_{Cr^{3+}/Cr^{2+}}^{0'} + \frac{RT}{F} \ln \left( \frac{KCr_{III}Ln}{KCr_{II}Ln} \right)$$

#### IV. REFERENCES

- (1) Robb, B. H.; Farrell, J. M.; Marshak, M. P. Chelated Chromium Electrolyte Enabling High-Voltage Aqueous Flow Batteries. *Joule* **2019**, 3 (10), 2503–2512.  
<https://doi.org/10.1016/j.joule.2019.07.002>.
- (2) Reber, D.; Thurston, J. R.; Becker, M.; Pach, G. F.; Wagoner, M. E.; Robb, B. H.; Waters, S. E.; Marshak, M. P. Mediating Anion-Cation Interactions to Improve Aqueous Flow Battery Electrolytes. *Appl. Mater. Today* **2022**, 28, 101512.  
<https://doi.org/10.1016/j.apmt.2022.101512>.
- (3) Robb, B. H.; Waters, S. E.; Marshak, M. P. Evaluating Aqueous Flow Battery Electrolytes: A Coordinated Approach. *Dalton Trans.* **2020**, 49 (45), 16047–16053.  
<https://doi.org/10.1039/D0DT02462G>.
